# Supplementary material
Source: Springer Nature journal article supplement (https://www.springermedizin.de/resource/supplementary/13256_2010_1498_MOESM1_ESM.pdf/9647776)

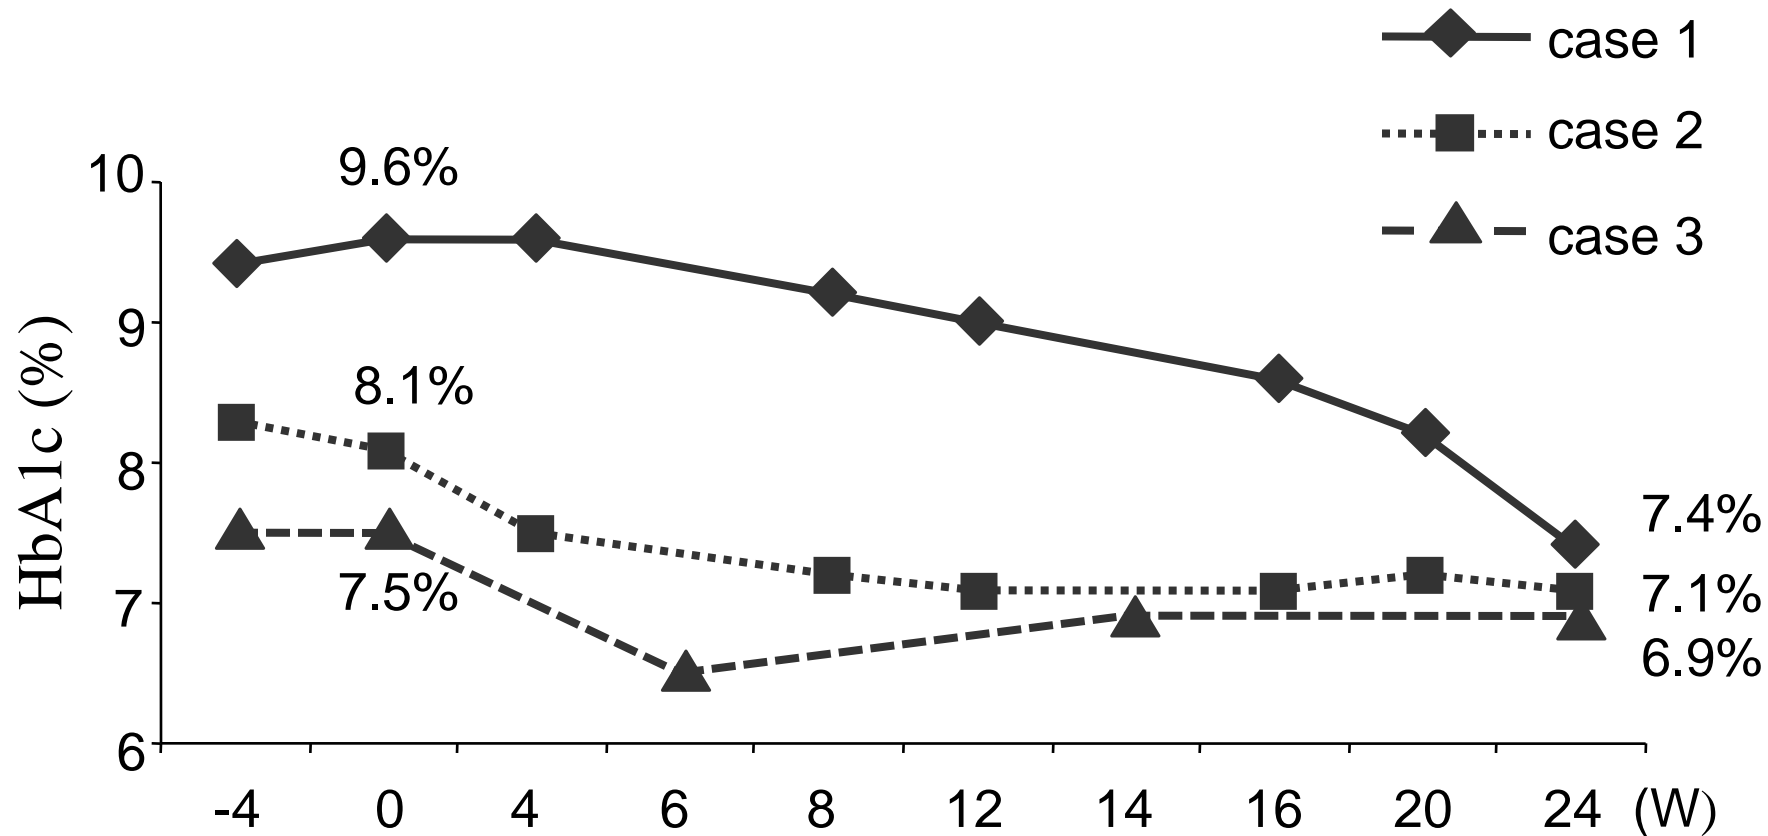

Weeks after addition of sitagliptin

Supplement: MOESM1 [file 9647776]
